# Supplementary material
Source: PubMed Central journal article supplement (PMC8526617)
Supplement: NIHMS1694210-supplement-1.pdf [file NIHMS1694210-supplement-1.pdf]

Patient-level True positive rate

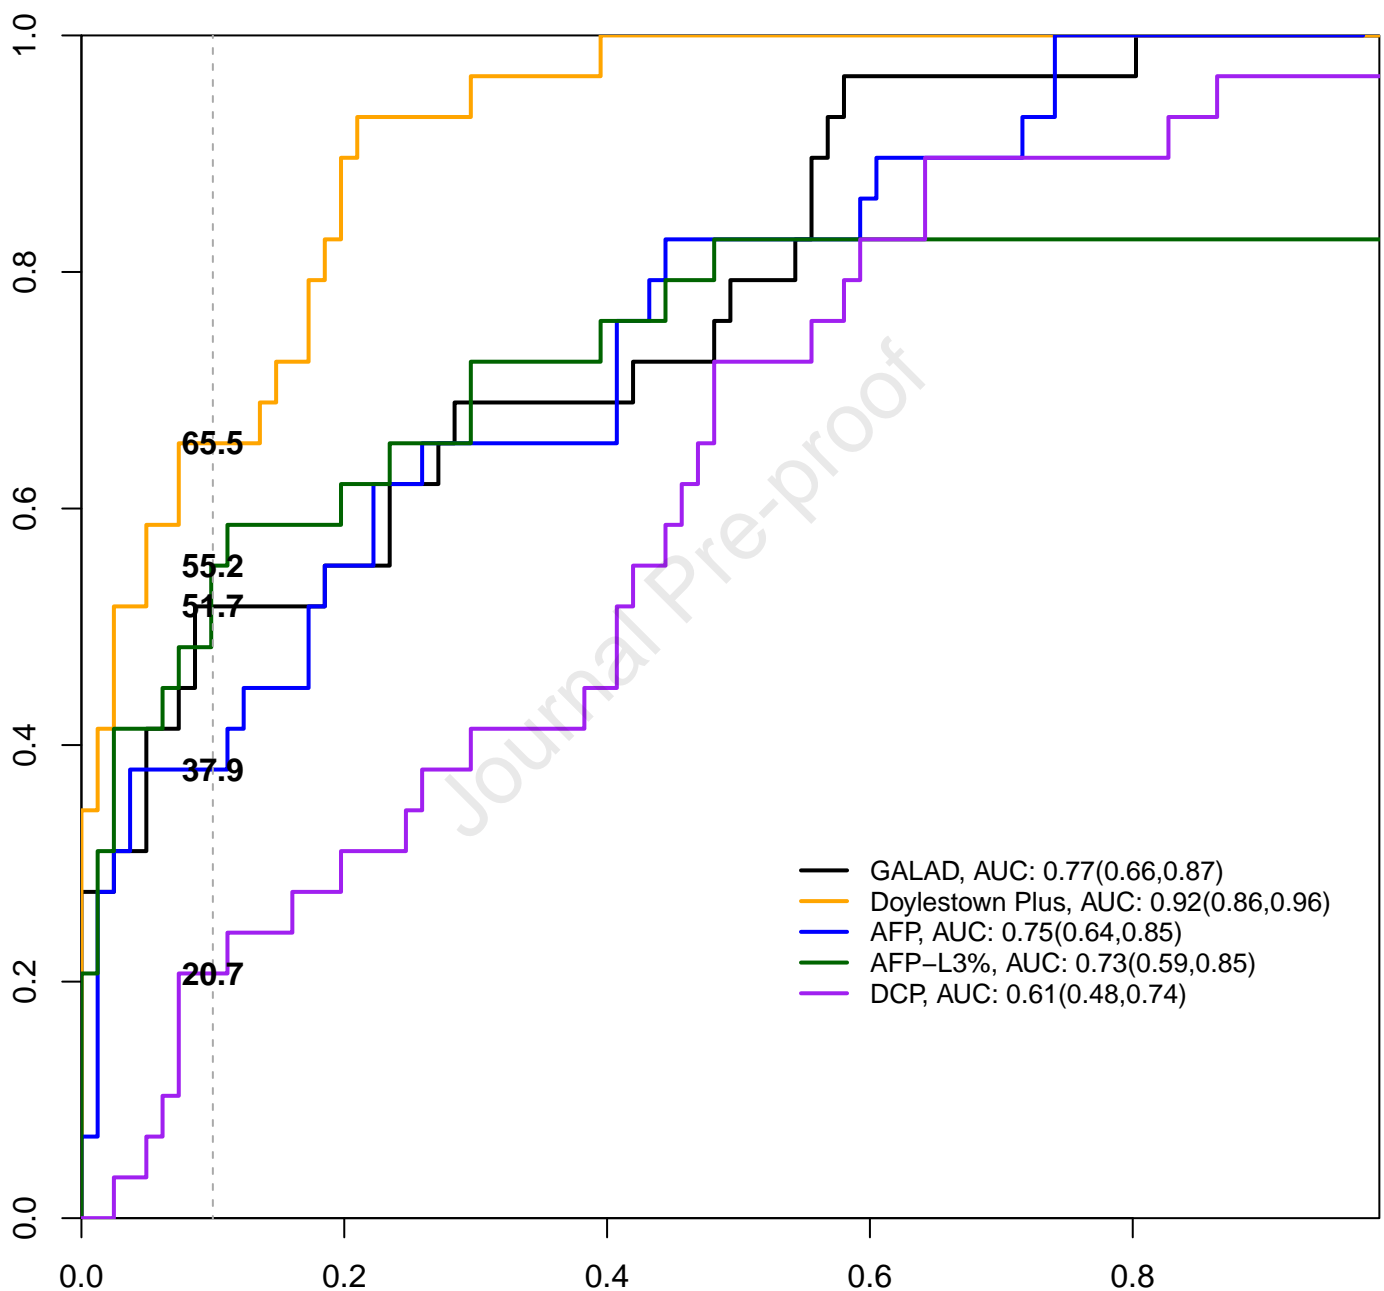

Screening-level false positive rate

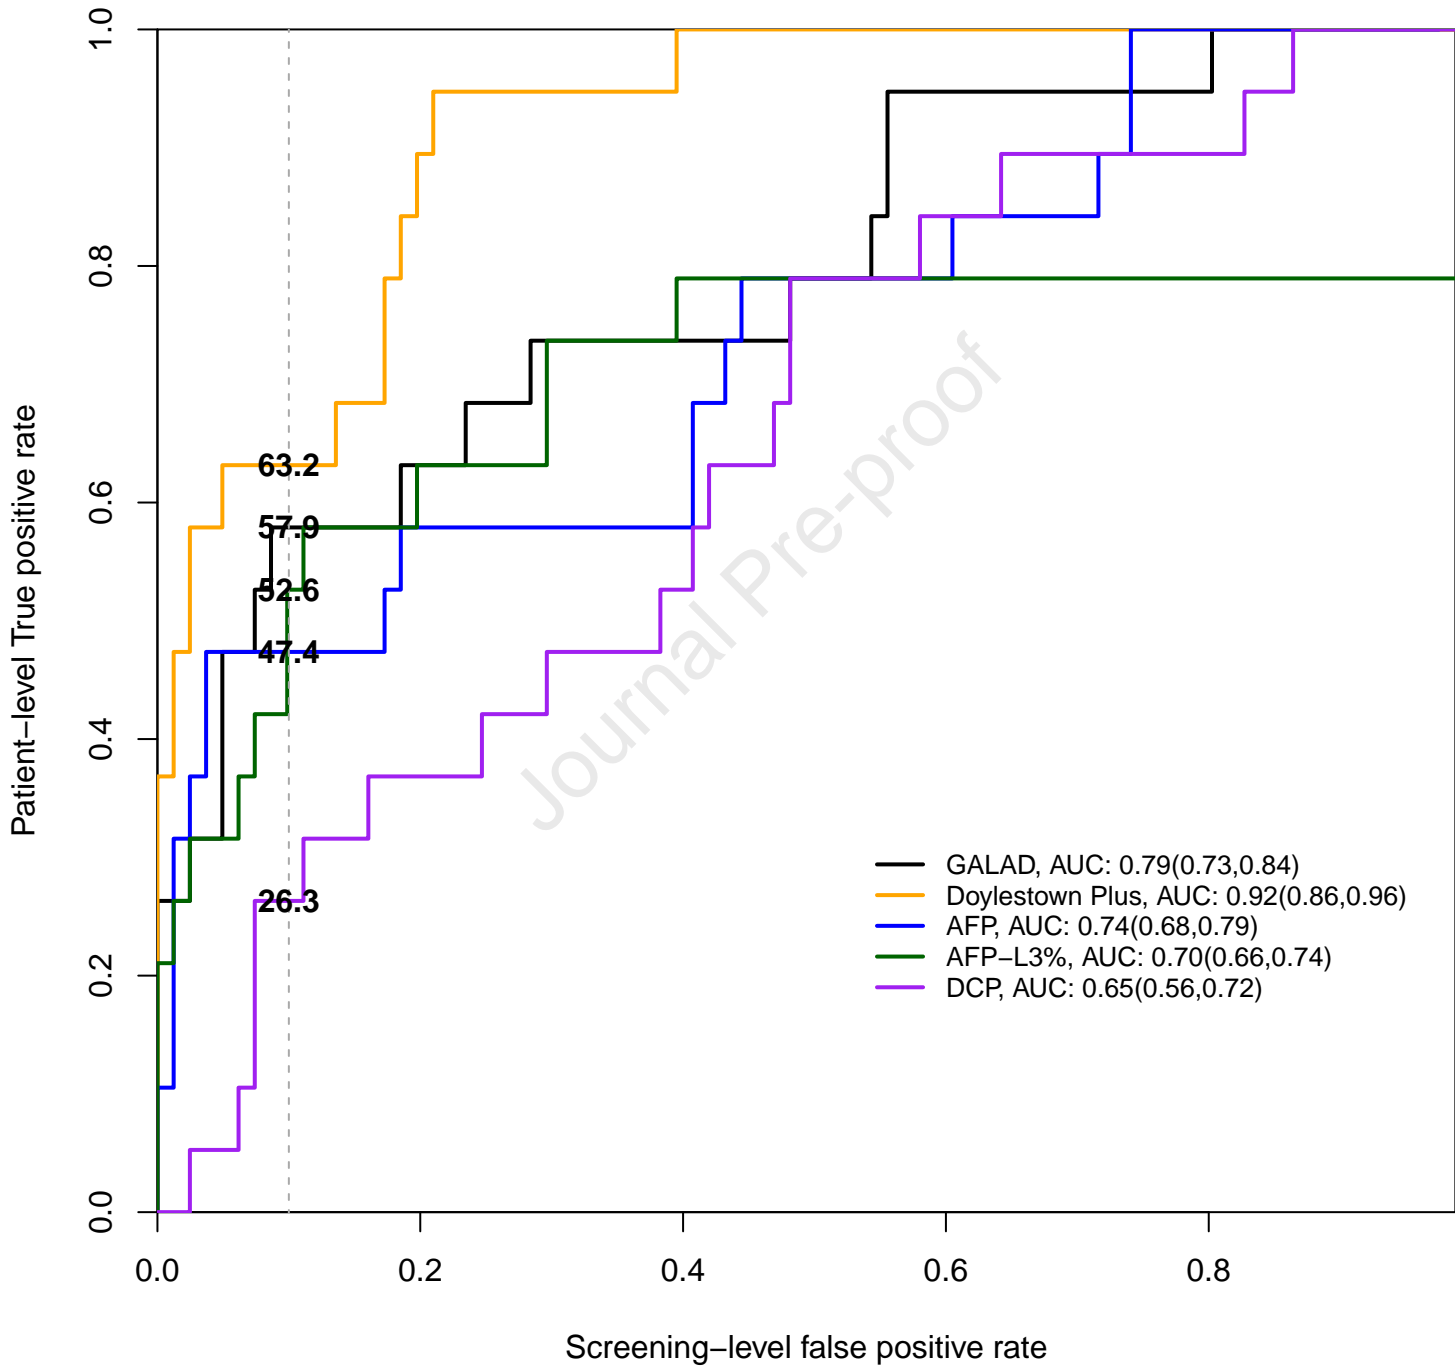

---

**Supplemental Figure 1A:** Receiver operating characteristic curves where patient-level sensitivity is estimated for any-stage HCC diagnosis

**Supplemental Figure 1B:** Receiver operating characteristic curves where patient-level sensitivity is estimated for early-stage HCC diagnosis

Journal Pre-proof

## Supplemental material

Patients were excluded if they had known HCC or suspicious liver lesions, refractory ascites, grade 3-4 encephalopathy, hepatorenal syndrome, co-morbid medical conditions with a life expectancy of less than one year, prior solid organ transplant, or known extrahepatic primary tumor.

Serum was transferred to Wako Diagnostics lab for AFP, highly sensitive AFP-L3% and DCP measurements using a microchip capillary electrophoresis and liquid-phase binding assay on a  $\mu$ TASWako i30 auto analyzer (Wako Pure Chemical Industries, Ltd. Osaka, Japan). Serum was analyzed for fucosylated kininogen and PEG-precipitated IgG as previously described.<sup>1</sup>

GALAD was calculated using the equation:  $Z = -10.08 + (0.09 \times \text{age}) + (1.67 \times \text{male sex}) + (2.34 * \log \text{AFP}) + (0.04 \times \text{AFP-L3}) + (1.33 \times \log \text{DCP})$ . The Doylestown Plus algorithm was calculated using the equation:  $1 / (1 + \text{EXP}(-(-22.2602 + (0.1648 * \text{age}) + (3.2923 * \log_{10} \text{AFP}) + (1.8921 * \text{PEG-precipitated IgG}) + (0.3924 * \text{fucosylated kininogen})))$ .

## Supplemental References

1. Wang M, Shen J, Herrera H, Singal A, et al. *Biomarker analysis of fucosylated kininogen through depletion of lectin reactive heterophilic antibodies in hepatocellular carcinoma*. J Immunol Methods, 2018. **462**: p. 59-64.

**Supplemental Table 1.** Patient Characteristics

| Characteristic                          | Cirrhosis controls<br>(n=58) | HCC cases<br>(n=29) | p-value |
|-----------------------------------------|------------------------------|---------------------|---------|
| Age (median, 95%CI)                     | 51.5 (27.0– 76.0)            | 53.0 (44.0 – 67.0)  | 0.3     |
| Sex (% male)                            | 32 (55.2%)                   | 21 (72.4%)          | 0.2     |
| Race/Ethnicity (%)                      |                              |                     | 0.6     |
| Non-Hispanic White                      | 51 (87.9%)                   | 25 (86.2%)          |         |
| Non-Hispanic Black                      | 0                            | 1 (3.4%)            |         |
| Hispanic White                          | 2 (3.4%)                     | 2 (6.9%)            |         |
| Asian                                   | 3 (5.2%)                     | 1 (3.4%)            |         |
| Other/unknown                           | 2(3.4%)                      | 0                   |         |
| Etiology of Liver Disease (%)           |                              |                     | 0.7     |
| Hepatitis C                             | 32 (55.2%)                   | 18(62.1%)           |         |
| Alcohol-related                         | 10(17.2%)                    | 5(17.2%)            |         |
| Cryptogenic/NAFLD                       | 6(10.3%)                     | 4(13.8%)            |         |
| Hepatitis B                             | 4(6.9%)                      | 0(0%)               |         |
| Other                                   | 6(10.3%)                     | 2(6.9%)             |         |
| Child Pugh Class (% Child A)            | 20 (34.5%)                   | 9 (31.0%)           | 0.8     |
| MELD                                    | 10 (6 – 17)                  | 10 (6 – 17)         | 1.0     |
| Number of HCC lesions                   |                              |                     | NA      |
| 1                                       | N/A                          | 20 (69.0%)          |         |
| 2                                       |                              | 6 (20.7%)           |         |
| 4                                       |                              | 1 (3.4%)            |         |
| >4                                      |                              | 2 (6.9%)            |         |
| Maximum HCC diameter                    | N/A                          | 2.6 (0.5 – 6.0)     | NA      |
| Vascular invasion or distant metastases | N/A                          | 5 (17.2%)           | NA      |
| BCLC Stage                              |                              |                     | NA      |
| Stage 0/A                               | N/A                          | 17 (58.6%)          |         |
| Stage B                                 |                              | 4 (13.8%)           |         |
| Stage C                                 |                              | 2 (6.9%)            |         |
| Stage D                                 |                              | 6 (20.7%)           |         |

\*Wilcoxon rank-sum tests were used to compare continuous variables and Fisher's exact test/Chi-squared test was used to compare categorical variables.
